# Supplementary material
Source: PubMed Central journal article supplement (PMC5559044)
Supplement: pnas.1706541114.sapp.pdf [file pnas.1706541114.sapp.pdf]

Supporting Material for  
Buying time promotes happiness

Ashley V. Whillans<sup>†</sup>, Elizabeth W. Dunn,  
Paul Smeets, Rene Bekkers, & Michael I. Norton

<sup>†</sup>To whom correspondence should be addressed:

Email: [awhillans@hbs.edu](mailto:awhillans@hbs.edu)

## Ancillary Results

**Table S1**

Additional information for relevant demographic variables in Studies 1-6

| Study    | <i>N</i> | Description          | % Time Saving | Primary Well-being Measures  | Omitted Demographics <sup>a</sup> | Additional Demographics                 | Secondary Well-being Measures                                                                                                            |
|----------|----------|----------------------|---------------|------------------------------|-----------------------------------|-----------------------------------------|------------------------------------------------------------------------------------------------------------------------------------------|
| 1        | 366      | US MTurkers          | 15.8%         | 2-item SWL ( $\alpha=0.73$ ) | Gender                            | --                                      | 5-item Meaning in Life <sup>b</sup> ( $\alpha=0.79$ )                                                                                    |
| 2        | 1260     | US Representative    | 21.9%         | 2-item SWL ( $\alpha=0.84$ ) | --                                | --                                      | --                                                                                                                                       |
| 3        | 467      | Danish Adults        | 23.1%         | 2-item SWL ( $\alpha=0.86$ ) | # of hours worked<br># of kids    | Occupation status                       | 1-item Meaning in Life <sup>b</sup><br>4-item Connection ( $\alpha=0.76$ ) <sup>b</sup><br>2-item Control ( $\alpha=0.71$ ) <sup>c</sup> |
| 4        | 326      | Canadian Adults      | 26.6%         | 2-item SWL ( $\alpha=0.85$ ) | --                                | \$ spent on entertainment & bills/month | 9-item Time Pressure ( $\alpha=0.86$ )                                                                                                   |
| 5        | 1232     | Dutch Representative | 21.2%         | 1-item SWL                   | --                                | Employed (1=Yes) <sup>d</sup>           | 4-item Time Pressure ( $\alpha=0.77$ )                                                                                                   |
| 6        | 818      | Dutch Millionaires   | 60.3%         | 1-item SWL                   | # of hours worked                 | Employed (1=Yes)                        | 6-item Time Pressure ( $\alpha=0.74$ )                                                                                                   |
| <i>N</i> | 4,469    |                      |               |                              |                                   |                                         |                                                                                                                                          |

*Note.* <sup>a</sup>Across all studies (unless otherwise indicated as omitted), respondents reported their annual household income, their marital status, the number of hours that they worked on average each week, the number of children that they had living at home, and their age and gender. We report additional covariates in the column “Additional demographics.” <sup>b</sup>Respondents in this study completed a 4-item Social Connection measure and 1-item measure of Meaning in Life (1, 2). <sup>c</sup>Respondents in this study also completed a 2-item measure of Perceived Control (3). <sup>d</sup>This variable represents whether individuals reported working for pay.

**Table S2**  
Regression analyses predicting satisfaction with life in Studies 1-6

| Study    | <i>N</i> | Study                | Time-saving purchases (1=Yes) | Time-saving purchases (1=Yes) with covariates | Time-saving purchases (Amount) | Time-saving purchases (Amount) Squared <sup>b</sup> | Time-saving purchases (Amount) Squared with covariates |
|----------|----------|----------------------|-------------------------------|-----------------------------------------------|--------------------------------|-----------------------------------------------------|--------------------------------------------------------|
| 1        | 366      | US MTurkers          | $\beta=.02$<br>$p=.713$       | $\beta=.03$<br>$p=.622$                       | $\beta=-.01$<br>$p=.863$       | $\beta=-.02$<br>$p=.870$                            | $\beta=-.02$<br>$p=.853$                               |
| 2        | 1260     | US Representative    | $\beta=-.14$<br>$p<.001$      | $\beta=.11$<br>$p<.001$                       | $\beta=.005$<br>$p=.854$       | $\beta=-.14$<br>$p=.005$                            | $\beta=-.12$<br>$p=.012$                               |
| 3        | 467      | Danish Adults        | $\beta=.16$<br>$p<.001$       | $\beta=.18$<br>$p=.001$                       | $\beta=.08$<br>$p=.124$        | $\beta=-.15$<br>$p=.087$                            | $\beta=-.13$<br>$p=.225$                               |
| 4        | 325      | Canadian Adults      | $\beta=.15$<br>$p=.005$       | $\beta=.16$<br>$p=.015$                       | $\beta=.12$<br>$p=.038$        | $\beta=.01$<br>$p=.925$                             | $\beta=-.02$<br>$p=.899$                               |
| 5        | 1232     | Dutch Representative | $\beta=.04$<br>$p=.143$       | $\beta=.04$<br>$p=.175$                       | $\beta=.05$<br>$p=.100$        | $\beta=-.05$<br>$p=.314$                            | $\beta=-.04$<br>$p=.432$                               |
| 6        | 818      | Dutch Millionaires   | $\beta=.10$<br>$p=.005$       | $\beta=.12$<br>$p=.004$                       | $\beta=.007$<br>$p=.839$       | $\beta=-.07$<br>$p=.397$                            | $\beta=-.09$<br>$p=.397$                               |
| <i>N</i> | 4,468    |                      |                               |                                               |                                |                                                     |                                                        |

*Note.* <sup>a</sup>See Tables S4-S18 for the full regression models for Studies 1-6 with all predictors entered simultaneously. We also assessed the linear and non-linear effect of amount spent on life satisfaction. There were no linear effects of amount across studies. <sup>b</sup>There was a significant quadratic effect: Respondents who spent a moderate amount reported the greatest life satisfaction, meta-analytic effect,  $Z=7.88$ ,  $p<0.001$ . See Figure S1.

**Table S3**

Time pressure items across Studies 4-8

| Items                                                                       | Study 4 | Study 5 | Study 6 | Study 7 | Study 8 |
|-----------------------------------------------------------------------------|---------|---------|---------|---------|---------|
| I feel pressed for time today. <sup>a</sup>                                 | X       |         |         |         |         |
| I feel under time pressure today. <sup>a</sup>                              | X       |         |         |         |         |
| I feel rushed today. <sup>a</sup>                                           | X       |         |         |         |         |
| Compared to yesterday, I feel more stressed out about my time. <sup>a</sup> | X       |         |         |         |         |
| I feel pressured for time. <sup>a</sup>                                     | X       |         |         |         |         |
| I feel like I am under time pressure. <sup>a</sup>                          | X       | X       | X       |         |         |
| I feel like I don't have enough time. <sup>a</sup>                          | X       | X       | X       |         |         |
| Time is my scarcest resource. <sup>a</sup>                                  | X       | X       | X       |         |         |
| My time is extremely valuable to me. <sup>a</sup>                           | X       | X       | X       |         |         |
| There have not been enough minutes in the day. <sup>b</sup>                 |         |         |         | X       | X       |
| I have felt like things have been really hectic. <sup>b</sup>               |         |         |         | X       | X       |
| I have had plenty of spare time today. <sup>b</sup>                         |         |         |         | X       | X       |

*Note.* <sup>a</sup>These items of time pressure are from a validated measure of time stress; in Studies 5 & 6 we used the four top-highest loading items from this scale (4). <sup>b</sup>These items are the three top-highest loading items from the Time Affluence Subscale of the Material & Time Affluence Scale (5).

**Table S4**

Moderation regression analyses with time-saving services and time pressure predicting life satisfaction in Studies 4-6

| Study    | <i>N</i> | Study                | Time-saving purchases X<br>time pressure on SWL | Association between time<br>pressure & SWL (Time-<br>saving purchases =Yes) | Association between<br>time pressure & SWL<br>(Time-saving purchases<br>=No) |
|----------|----------|----------------------|-------------------------------------------------|-----------------------------------------------------------------------------|------------------------------------------------------------------------------|
| 4        | 311      | Canadian Adults      | $\beta=.09$<br>$p=.146$                         | $\beta=-.12$<br>$p=.262$                                                    | $\beta=-.28$<br>$p<.001$                                                     |
| 5        | 1232     | Dutch Representative | $\beta=.04$<br>$p=.244$                         | $\beta=-.14$<br>$p=.025$                                                    | $\beta=-.20$<br>$p<.001$                                                     |
| 6        | 818      | Dutch Millionaires   | $\beta=.22$<br>$p<.001$                         | $\beta=-.01$<br>$p=.895$                                                    | $\beta=-.28$<br>$p<.001$                                                     |
| <i>N</i> | 2,361    |                      |                                                 |                                                                             |                                                                              |

**Table S5**

Moderation regression analyses with time-saving services and household income predicting life satisfaction in Studies 1-7

| Study | Study                | Time-saving purchases X income on SWL | Time-saving purchases X income/wealth on SWL |
|-------|----------------------|---------------------------------------|----------------------------------------------|
| 1     | US MTurkers          | $\beta=-.01$<br>$p=.851$              | $\beta=-.19$<br>$p=.155$                     |
| 2     | US Representative    | $\beta=-.08$<br>$p=.019$              | $\beta=-.43$<br>$p=.003$                     |
| 3     | Danish Adults        | $\beta=.07$<br>$p=.261$               | $\beta=.29$<br>$p=.211$                      |
| 4     | Canadian Adults      | $\beta=-.04$<br>$p=.544$              | $\beta=-.19$<br>$p=.563$                     |
| 5     | Dutch Representative | NA                                    | $\beta=-.04$<br>$p=.179$                     |
| 6     | Dutch Millionaires   | NA                                    | $\beta=-.18$<br>$p=.102$                     |
| 7     | US Qualtrics         | $\beta=-.04$<br>$p=.281$              | $\beta=-.22$<br>$p=.060$                     |

*N**Note.* In Study 5 and 6 log net-worth was used as a proxy for wealth.

**Table S6**

Regression predicting SWL from Time-Saving purchases (1=Yes) in Study 2 with all covariates entered simultaneously in the model

| <i>Predictor</i>              | $\beta$ | <i>B</i> | (SE) | <i>P value</i><br><i>for predictor</i> | <i>F value</i><br><i>for model</i> | <i>P value</i> | <i>R-square</i> |
|-------------------------------|---------|----------|------|----------------------------------------|------------------------------------|----------------|-----------------|
| Time-Saving Purchases (1=Yes) | .11     | .48      | .11  | < .001                                 |                                    |                |                 |
| Income                        | .18     | .08      | .01  | < .001                                 |                                    |                |                 |
| Age                           | .15     | .02      | .003 | < .001                                 |                                    |                |                 |
| Marital Status (1=Married)    | .16     | .57      | .11  | <.001                                  |                                    |                |                 |
| # of Hours Worked/Week        | .01     | .001     | .004 | .858                                   |                                    |                |                 |
| # of Kids at Home             | .01     | .02      | .04  | .695                                   |                                    |                |                 |
| Gender (1=Female)             | .02     | .07      | .09  | .458                                   | $F(7, 1251)=25.93$                 | < .001         | .13             |

**Table S7**

Regression predicting SWL from Time-Saving purchases (1=Yes) in Study 2 with alternative covariates entered simultaneously in the model

| <i>Predictor</i>              | $\beta$ | <i>B</i> | (SE)  | <i>P value</i><br><i>for predictor</i> | <i>F value</i><br><i>for model</i> | <i>P value</i> | <i>R-square</i> |
|-------------------------------|---------|----------|-------|----------------------------------------|------------------------------------|----------------|-----------------|
| Time-Saving Purchases (1=Yes) | .12     | .50      | .11   | < .001                                 |                                    |                |                 |
| Log Income                    | .16     | .65      | .11   | < .001                                 |                                    |                |                 |
| Age Centered                  | .14     | .02      | .003  | < .001                                 |                                    |                |                 |
| Age Squared                   | .07     | .001     | .0001 | .015                                   |                                    |                |                 |
| Marital Status (1=Married)    | .18     | .64      | .11   | <.001                                  |                                    |                |                 |
| # of Hours Worked/Week        | .02     | .002     | .004  | .599                                   |                                    |                |                 |
| # of Kids at Home             | .03     | .04      | .04   | .342                                   |                                    |                |                 |
| Gender (1=Female)             | .03     | .09      | .10   | .358                                   | $F(8, 1251)=22.49$                 | < .001         | .13             |

**Table S8**

Regression predicting SWL from Time-saving purchases (1=Yes) in Study 3 with all covariates entered simultaneously in the model

| <i>Predictor</i>              | $\beta$ | <i>B</i> | (SE) | <i>P value</i><br><i>for predictor</i> | <i>F value</i><br><i>for model</i> | <i>P value</i> | <i>R-square</i> |
|-------------------------------|---------|----------|------|----------------------------------------|------------------------------------|----------------|-----------------|
| Time-Saving Purchases (1=Yes) | .18     | .60      | .18  | < .001                                 |                                    |                |                 |
| Income                        | .16     | .19      | .08  | .023                                   |                                    |                |                 |
| Age                           | .12     | .12      | .07  | .078                                   |                                    |                |                 |
| Marital Status (1=Married)    | .12     | .34      | .17  | .043                                   |                                    |                |                 |
| Occupation Status             | .09     | .06      | .06  | .295                                   |                                    |                |                 |
| Employment (1=Employed)       | -.25    | -.71     | .24  | .003                                   |                                    |                |                 |
| Gender (1=Female)             | -.03    | -.08     | .16  | .603                                   | $F(7, 332)=5.54$                   | < .001         | .11             |

*Note.* Study 3 did not ask participants to report the number of children they had living at home or how many hours they worked.

**Table S9**

Regression predicting SWL from Time-saving purchases (1=Yes) in Study 3 with alternative set of covariates entered simultaneously in the model

| <i>Predictor</i>              | $\beta$ | <i>B</i> | (SE) | <i>P value</i><br><i>for predictor</i> | <i>F value</i><br><i>for model</i> | <i>P value</i> | <i>R-square</i> |
|-------------------------------|---------|----------|------|----------------------------------------|------------------------------------|----------------|-----------------|
| Time-Saving Purchases (1=Yes) | .19     | .64      | .18  | < .001                                 |                                    |                |                 |
| Log Income                    | .15     | .53      | .26  | .043                                   |                                    |                |                 |
| Age Centered                  | .17     | .18      | .08  | .023                                   |                                    |                |                 |
| Age Squared                   | .12     | .08      | .05  | .092                                   |                                    |                |                 |
| Marital Status (1=Married)    | .14     | .42      | .17  | .013                                   |                                    |                |                 |
| Occupation Status             | .06     | .04      | .06  | .459                                   |                                    |                |                 |
| Employment (1=Employed)       | -.17    | -.48     | .08  | .065                                   |                                    |                |                 |
| Gender (1=Female)             | -.04    | -.10     | .16  | .519                                   | $F(8, 332)=4.89$                   | < .001         | .11             |

*Note.* Study 3 did not ask participants to report the number of children they had living at home or how many hours they worked.



**Table S10**

Regression predicting meaning in life from Time-saving purchases (1=Yes) in Study 3 with all covariates entered simultaneously in the model

| <i>Predictor</i>              | $\beta$ | <i>B</i> | (SE) | <i>P value</i><br><i>for predictor</i> | <i>F value</i><br><i>for model</i> | <i>P value</i> | <i>R-square</i> |
|-------------------------------|---------|----------|------|----------------------------------------|------------------------------------|----------------|-----------------|
| Time-Saving Purchases (1=Yes) | .14     | .21      | .08  | .015                                   |                                    |                |                 |
| Income                        | -.02    | -.01     | .04  | .829                                   |                                    |                |                 |
| Age                           | .10     | .05      | .03  | .170                                   |                                    |                |                 |
| Marital Status (1=Married)    | .13     | .17      | .08  | .031                                   |                                    |                |                 |
| Occupation Status             | .06     | .02      | .03  | .466                                   |                                    |                |                 |
| Employment (1=Employed)       | .09     | .11      | .11  | .337                                   |                                    |                |                 |
| Gender (1=Female)             | .01     | .01      | .07  | .874                                   | $F(7, 320)=2.50$                   | .017           | .05             |

**Table S11**

Regression predicting social connection from Time-saving purchases (1=Yes) in Study 3 with all covariates entered simultaneously in the model

| <i>Predictor</i>              | $\beta$ | <i>B</i> | (SE) | <i>P value</i><br><i>for predictor</i> | <i>F value</i><br><i>for model</i> | <i>P value</i> | <i>R-square</i> |
|-------------------------------|---------|----------|------|----------------------------------------|------------------------------------|----------------|-----------------|
| Time-Saving Purchases (1=Yes) | .14     | .17      | .07  | .012                                   |                                    |                |                 |
| Income                        | .04     | .02      | .03  | .607                                   |                                    |                |                 |
| Age                           | .04     | .02      | .03  | .551                                   |                                    |                |                 |
| Marital Status (1=Married)    | .20     | .22      | .06  | .001                                   |                                    |                |                 |
| Occupation Status             | .11     | .03      | .02  | .170                                   |                                    |                |                 |
| Employment (1=Employed)       | -.23    | -.24     | .09  | .007                                   |                                    |                |                 |
| Gender (1=Female)             | -.09    | -.10     | .06  | .095                                   | $F(7, 331)=4.24$                   | < .001         | .08             |

**Table S12**

Regression predicting perceived control from Time-saving purchases (1=Yes) in Study 3 with all covariates entered simultaneously in the model

| <i>Predictor</i>              | $\beta$ | <i>B</i> | (SE) | <i>P value</i><br><i>for predictor</i> | <i>F value</i><br><i>for model</i> | <i>P value</i> | <i>R-square</i> |
|-------------------------------|---------|----------|------|----------------------------------------|------------------------------------|----------------|-----------------|
| Time-Saving Purchases (1=Yes) | .15     | .21      | .08  | .008                                   |                                    |                |                 |
| Income                        | .06     | .03      | .04  | .421                                   |                                    |                |                 |
| Age                           | .30     | .14      | .03  | < .001                                 |                                    |                |                 |
| Marital Status (1=Married)    | .14     | .18      | .08  | .019                                   |                                    |                |                 |
| Occupation Status             | .16     | .05      | .03  | .043                                   |                                    |                |                 |
| Employment (1=Employed)       | -.15    | -.19     | .11  | .083                                   |                                    |                |                 |
| Gender (1=Female)             | .02     | .02      | .07  | .736                                   | $F(7, 331)=6.61$                   | < .001         | .13             |

**Table S13**

Regression predicting SWL from Time-saving purchases (1=Yes) in Study 4 with all covariates entered simultaneously in the model

| <i>Predictor</i>              | $\beta$ | <i>B</i> | (SE) | <i>P value</i><br><i>for predictor</i> | <i>F value</i><br><i>for model</i> | <i>P value</i> | <i>R-square</i> |
|-------------------------------|---------|----------|------|----------------------------------------|------------------------------------|----------------|-----------------|
| Time-Saving Purchases (1=Yes) | .16     | .50      | .21  | .015                                   |                                    |                |                 |
| Income                        | .12     | .04      | .03  | .107                                   |                                    |                |                 |
| Age                           | .11     | .01      | .01  | .150                                   |                                    |                |                 |
| Marital Status (1=Married)    | .13     | .36      | .21  | .086                                   |                                    |                |                 |
| # of Hours Worked/Week        | -.01    | .001     | .01  | .938                                   |                                    |                |                 |
| # of Kids at Home             | -.04    | -.09     | .14  | .548                                   | $F(6, 224)=4.43$                   | < .001         | .11             |

**Table S14**

Regression predicting SWL from Time-saving purchases (1=Yes) in Study 4 with alternative covariates entered simultaneously in the model

| <i>Predictor</i>              | $\beta$ | <i>B</i> | (SE)  | <i>P value</i><br><i>for predictor</i> | <i>F value</i><br><i>for model</i> | <i>P value</i> | <i>R-square</i> |
|-------------------------------|---------|----------|-------|----------------------------------------|------------------------------------|----------------|-----------------|
| Time-Saving Purchases (1=Yes) | .17     | .53      | .21   | .011                                   |                                    |                |                 |
| Log Income                    | .09     | .56      | .42   | .187                                   |                                    |                |                 |
| Age Centered                  | .09     | .01      | .01   | .303                                   |                                    |                |                 |
| Age Squared                   | .05     | .0001    | .0001 | .552                                   |                                    |                |                 |
| Marital Status (1=Married)    | .15     | .42      | .21   | .049                                   |                                    |                |                 |
| # of Hours Worked/Week        | .01     | .0001    | .01   | .926                                   |                                    |                |                 |
| # of Kids at Home             | -.02    | -.05     | .15   | .733                                   | $F(7, 224)=3.69$                   | .001           | .11             |

**Table S15**

Regression predicting SWL from Time-saving purchases (1=Yes) in Study 5 with all covariates entered simultaneously in the model

| <i>Predictor</i>              | $\beta$ | <i>B</i> | (SE) | <i>P value</i><br><i>for predictor</i> | <i>F value</i><br><i>for model</i> | <i>P value</i> | <i>R-square</i> |
|-------------------------------|---------|----------|------|----------------------------------------|------------------------------------|----------------|-----------------|
| Time-Saving Purchases (1=Yes) | .04     | .12      | .09  | .175                                   |                                    |                |                 |
| Log Net-worth                 | .09     | .18      | .06  | .002                                   |                                    |                |                 |
| Age                           | .02     | .002     | .003 | .577                                   |                                    |                |                 |
| Marital Status (1=Married)    | .14     | .36      | .08  | < .001                                 |                                    |                |                 |
| Employment (1=Yes)            | -.13    | -.36     | .09  | < .001                                 |                                    |                |                 |
| Gender (1=Female)             | .01     | .04      | .08  | .635                                   |                                    |                |                 |
| # of Kids at Home             | .06     | .08      | .04  | .084                                   | $F(7, 1231)=10.28$                 | < .001         | .06             |

*Note.* In Study 5 and 6 log net-worth was used as a proxy for wealth.

**Table S16**

Regression predicting SWL from Time-saving purchases (1=Yes) in Study 5 with alternative covariates entered simultaneously in the model

| <i>Predictor</i>              | $\beta$ | <i>B</i> | (SE)  | <i>P value</i><br><i>for predictor</i> | <i>F value</i><br><i>for model</i> | <i>P value</i> | <i>R-square</i> |
|-------------------------------|---------|----------|-------|----------------------------------------|------------------------------------|----------------|-----------------|
| Time-Saving Purchases (1=Yes) | .02     | .07      | .09   | .417                                   |                                    |                |                 |
| Log Net-worth                 | .09     | .19      | .06   | .001                                   |                                    |                |                 |
| Age Centered                  | .05     | .004     | .003  | .179                                   |                                    |                |                 |
| Age Squared                   | .15     | .001     | .0001 | < .001                                 |                                    |                |                 |
| Marital Status (1=Married)    | .16     | .43      | .08   | < .001                                 |                                    |                |                 |
| Employment (1=Yes)            | -.05    | -.14     | .10   | .181                                   |                                    |                |                 |
| Gender (1=Female)             | .03     | .08      | .08   | .274                                   |                                    |                |                 |
| # of Kids at Home             | .06     | .08      | .04   | .057                                   | $F(8, 1231)=11.88$                 | < .001         | .07             |

*Note.* In Study 5 and 6 log net-worth was used as a proxy for wealth.

**Table S17**

Regression predicting SWL from Time-saving purchases (1=Yes) in Study 6 with all covariates entered simultaneously in the model

| <i>Predictor</i>              | $\beta$ | <i>B</i> | (SE) | <i>P value</i><br><i>for predictor</i> | <i>F value</i><br><i>for model</i> | <i>P value</i> | <i>R-square</i> |
|-------------------------------|---------|----------|------|----------------------------------------|------------------------------------|----------------|-----------------|
| Time-Saving Purchases (1=Yes) | .12     | .24      | .08  | .004                                   |                                    |                |                 |
| Log Net-worth                 | -.01    | -.01     | .11  | .906                                   |                                    |                |                 |
| Age                           | -.04    | -.004    | .01  | .442                                   |                                    |                |                 |
| Marital Status (1=Married)    | .12     | .28      | .10  | .005                                   |                                    |                |                 |
| Employment (1=Yes)            | -.06    | -.14     | .12  | .240                                   |                                    |                |                 |
| Gender (1=Female)             | -.02    | -.06     | .12  | .614                                   |                                    |                |                 |
| # of Kids at Home             | -.06    | -.07     | .06  | .186                                   | <i>F</i> (7, 606)=3.20             | .002           | .04             |

*Note.* In Study 5 and 6 log net-worth was used as a proxy for wealth.

**Table S18**

Regression predicting SWL from Time-saving purchases (1=Yes) in Study 6 with alternative covariates entered simultaneously in the model

| <i>Predictor</i>              | $\beta$ | <i>B</i> | (SE)  | <i>P value</i><br><i>for predictor</i> | <i>F value</i><br><i>for model</i> | <i>P value</i> | <i>R-square</i> |
|-------------------------------|---------|----------|-------|----------------------------------------|------------------------------------|----------------|-----------------|
| Time-Saving Purchases (1=Yes) | .12     | .24      | .08   | .004                                   |                                    |                |                 |
| Log Net-worth                 | -.01    | -.01     | .11   | .904                                   |                                    |                |                 |
| Age Centered                  | -.04    | -.004    | .01   | .448                                   |                                    |                |                 |
| Age Squared                   | .02     | .0001    | .0001 | .712                                   |                                    |                |                 |
| Marital Status (1=Married)    | .13     | .29      | .11   | .006                                   |                                    |                |                 |
| Employment (1=Yes)            | -.07    | -.15     | .12   | .223                                   |                                    |                |                 |
| Gender (1=Female)             | -.02    | -.06     | .13   | .629                                   |                                    |                |                 |
| # of Kids at Home             | -.06    | -.08     | .06   | .171                                   | <i>F</i> (8, 606)=2.81             | .005           | .04             |

*Note.* In Study 5 and 6 log net-worth was used as a proxy for wealth.

**Figure S1**

The meta-analytic quadratic effect of amount spent on time-saving purchases on life satisfaction across Studies 1-6

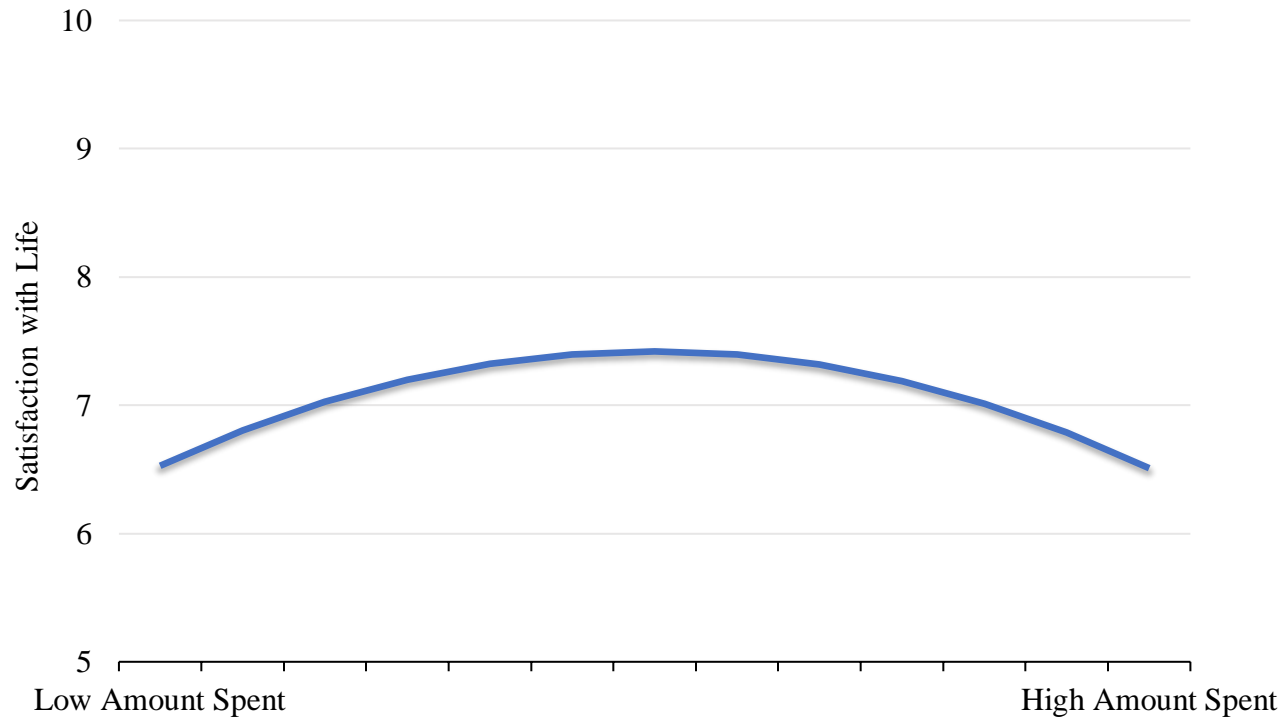

*Note.* The midpoint corresponds to spending approx. \$101 to \$200 USD to outsource disliked tasks per month. The endpoints depict  $\pm 1SD = \$71 - \$80$  USD spent to outsource per month.

## **Study 5 & 6: Samples Recruited from Netherlands**

### **Additional Methodological Details**

**Study 5.** Studies 5 and 6 were collected as part of a larger study, examining philanthropy in the Netherlands (6). In this study, we used data from the 2015 wave of the Giving in the Netherlands Panel Survey (7), a nationally representative sample of Dutch adults. This sample was recruited online via TNS/NIPO (Kantar Public), one of the leading survey agencies in the Netherlands. In this study, respondents completed the one-item Cantril Ladder. Next, participants reported their feelings of time stress. Respondents then completed several measures that are outside the scope of the current investigation and completed the two key buying-time questions. At the end of the survey, respondents answered our key demographic questions of interest.

**Study 6.** We also recruited a sample of high net-worth Dutch adults relying on a database constructed by Elite Research based on public records (7). Through postal mail, prospective respondents received a questionnaire with invitation letter explaining the study. The letter also included a generic link to an online survey. 407 participants completed the survey online, 484 participants completed the survey on paper. The questions used in Study 6 were identical to those used in Study 5.

### **Additional Results**

**Study 6.** In the analyses reported in text, we included all respondents from the high net-worth sample who completed our key questions of interest. Although median net-worth was close to a million dollars in the full sample, we conducted additional analyses in which we restricted the sample to individuals whose net-worth was over \$1M USD ( $N=404$ ); using this approach, the results of Study 6 were substantively unchanged (Tables S19a-S20c).

**Table S19a**

Regression predicting SWL from Time-saving purchases (1=Yes) in Study 6 using only respondents with net-worth above \$1M USD

| <i>Predictor</i>              | $\beta$ | <i>B</i> | (SE) | <i>P value</i><br><i>for predictor</i> | <i>F value</i><br><i>for model</i> | <i>P value</i> | <i>R-square</i> |
|-------------------------------|---------|----------|------|----------------------------------------|------------------------------------|----------------|-----------------|
| Time-Saving Purchases (1=Yes) | .13     | .29      | .11  | .007                                   |                                    |                |                 |
|                               |         |          |      |                                        | $F(1, 404)=7.37$                   | .007           | .02             |

**Table S19b**

Regression predicting SWL from Time-saving purchases (1=Yes) in Study 6 using only respondents with net-worth above \$1M USD

| <i>Predictor</i>              | $\beta$ | <i>B</i> | (SE) | <i>P value</i><br><i>for predictor</i> | <i>F value</i><br><i>for model</i> | <i>P value</i> | <i>R-square</i> |
|-------------------------------|---------|----------|------|----------------------------------------|------------------------------------|----------------|-----------------|
| Time-Saving Purchases (1=Yes) | .18     | .41      | .13  | .002                                   |                                    |                |                 |
| Log Net-worth                 | .09     | .92      | .57  | .104                                   |                                    |                |                 |
| Age                           | -.11    | -.01     | .01  | .159                                   |                                    |                |                 |
| Marital Status (1=Married)    | .12     | .33      | .17  | .044                                   |                                    |                |                 |
| Employment (1=Yes)            | -.03    | -.07     | .17  | .654                                   |                                    |                |                 |
| Gender (1=Female)             | -.10    | -.33     | .20  | .100                                   |                                    |                |                 |
| # of Kids at Home             | -.07    | -.09     | .08  | .255                                   |                                    |                |                 |
|                               |         |          |      |                                        | $F(7, 301)=3.06$                   | .004           | .07             |

*Note.* In Study 5 and 6 log net-worth was used as a proxy for wealth.

**Table S19c**

Regression predicting SWL from Time-saving purchases (1=Yes) in Study 6 using only respondents with net-worth above \$1M USD

| <i>Predictor</i>              | $\beta$ | <i>B</i> | (SE)  | <i>P value</i><br><i>for predictor</i> | <i>F value</i><br><i>for model</i> | <i>P value</i> | <i>R-square</i> |
|-------------------------------|---------|----------|-------|----------------------------------------|------------------------------------|----------------|-----------------|
| Time-Saving Purchases (1=Yes) | .18     | .41      | .13   | .002                                   |                                    |                |                 |
| Log Net-worth                 | .10     | .95      | .58   | .099                                   |                                    |                |                 |
| Age Centered                  | -.11    | -.01     | .007  | .151                                   |                                    |                |                 |
| Age Squared                   | -.02    | .0001    | .0001 | .769                                   |                                    |                |                 |
| Marital Status (1=Married)    | .11     | .32      | .18   | .072                                   |                                    |                |                 |
| Employment (1=Yes)            | -.03    | -.07     | .17   | .657                                   |                                    |                |                 |
| Gender (1=Female)             | -.10    | -.32     | .20   | .104                                   |                                    |                |                 |
| # of Kids at Home             | -.07    | -.08     | .08   | .293                                   |                                    |                |                 |
|                               |         |          |       |                                        | $F(8, 301)=2.68$                   | .007           | .07             |

*Note.* In Study 5 and 6 log net-worth was used as a proxy for wealth.

**Table S20a**

Time Pressure X Time-Saving Purchase (1=Yes) Interaction in Study 6 using only respondents with net-worth above \$1M USD

| <i>Predictor</i>              | $\beta$ | <i>B</i> | (SE) | <i>P value<br/>for predictor</i> | <i>F value<br/>for model</i> | <i>P value</i> | <i>R-square</i> |
|-------------------------------|---------|----------|------|----------------------------------|------------------------------|----------------|-----------------|
| Time-Saving Purchases (1=Yes) | .14     | .30      | .11  | .005                             |                              |                |                 |
| Time Pressure Centered        | -.18    | -.11     | .05  | .035                             |                              |                |                 |
| Time-Saving X Time Pressure   | .21     | .17      | .07  | .013                             | $F(3, 382)=4.75$             | .003           | .04             |

**Table S20b**

Regression predicting SWL from Time Pressure using only respondents who did not make time-saving purchases with net-worth above \$1M USD

| <i>Predictor</i> | $\beta$ | <i>B</i> | (SE) | <i>P value<br/>for predictor</i> | <i>F value<br/>for model</i> | <i>P value</i> | <i>R-square</i> |
|------------------|---------|----------|------|----------------------------------|------------------------------|----------------|-----------------|
| Time Pressure    | -.18    | -.11     | .05  | .034                             | $F(1, 136)=4.60$             | .034           | .03             |

**Table S20c**

Regression predicting SWL from Time Pressure using only respondents who did make time-saving purchases with net-worth above \$1M USD

| <i>Predictor</i> | $\beta$ | <i>B</i> | (SE) | <i>P value<br/>for predictor</i> | <i>F value<br/>for model</i> | <i>P value</i> | <i>R-square</i> |
|------------------|---------|----------|------|----------------------------------|------------------------------|----------------|-----------------|
| Time Pressure    | .09     | .06      | .04  | .178                             | $F(1, 245)=1.83$             | .178           | .007            |



## **Study 7: Employed Americans Recruited from Qualtrics**

### **Additional Results**

As reported in text, respondents who made time-saving purchases reported greater SWL. These results held controlling for our initial demographic covariates of interest, as well as for the amount that respondents spent on groceries each week and the amount that respondents spent on material purchases and experiential purchases each month (Tables S21-S23b).

We observed a linear effect of the amount of money spent on time-saving purchases each month and SWL,  $\beta=0.30$ ,  $p<0.001$ . These results held controlling for our covariates (Tables S24a&b). In this study, there was no quadratic effect of amount spent on SWL,  $p=0.566$ .

**Table S21**

Time-saving purchases (1=Yes) predicting SWL in Study 7 with primary covariates

| <i>Predictor</i>              | $\beta$ | <i>B</i> | (SE) | <i>P value</i><br><i>for predictor</i> | <i>F value</i><br><i>for model</i> | <i>P value</i> | <i>R-square</i> |
|-------------------------------|---------|----------|------|----------------------------------------|------------------------------------|----------------|-----------------|
| Time-Saving Purchases (1=Yes) | .23     | .84      | .09  | < .001                                 |                                    |                |                 |
| Household Income              | .11     | .06      | .01  | < .001                                 |                                    |                |                 |
| Age                           | -.003   | -.01     | .04  | .890                                   |                                    |                |                 |
| Marital Status (1=Married)    | .08     | .33      | .10  | .001                                   |                                    |                |                 |
| # of hours worked/week        | -.03    | -.004    | .003 | .271                                   |                                    |                |                 |
| Gender (1=Female)             | -.03    | -.11     | .09  | .214                                   |                                    |                |                 |
| # of Kids at Home             | .13     | .20      | .04  | < .001                                 | <i>F</i> (7,1604)=28.84            | < .001         | .11             |

**Table S22**

Time-saving purchases (1=Yes) predicting SWL in Study 7 with additional covariates

| <i>Predictor</i>                   | $\beta$ | <i>B</i> | (SE) | <i>P value</i><br><i>for predictor</i> | <i>F value</i><br><i>for model</i> | <i>P value</i> | <i>R-square</i> |
|------------------------------------|---------|----------|------|----------------------------------------|------------------------------------|----------------|-----------------|
| Time-Saving Purchases (1=Yes)      | .15     | .55      | .10  | < .001                                 |                                    |                |                 |
| Household Income                   | .06     | .03      | .01  | .024                                   |                                    |                |                 |
| Age                                | .03     | .05      | .04  | .213                                   |                                    |                |                 |
| Marital Status (1=Married)         | .07     | .28      | .10  | .006                                   |                                    |                |                 |
| # of Hours Worked/Week             | -.02    | -.003    | .003 | .394                                   |                                    |                |                 |
| Gender (1=Female)                  | -.02    | -.08     | .09  | .374                                   |                                    |                |                 |
| # of Kids at Home                  | .11     | .17      | .04  | < .001                                 |                                    |                |                 |
| Amount Spent on Bills/Week         | .01     | .01      | .01  | .654                                   |                                    |                |                 |
| Amount Spent on Material Purchases | .13     | .07      | .02  | < .001                                 |                                    |                |                 |
| Amount Spent on Experiences        | .13     | .06      | .01  | < .001                                 | <i>F</i> (10,1601)=28.62           | < .001         | .15             |

**Table S23a**

Time-saving purchases (1=Yes) predicting SWL in Study 7 with revised covariates

| <i>Predictor</i>              | $\beta$ | <i>B</i> | (SE) | <i>P value</i><br><i>for predictor</i> | <i>F value</i><br><i>for model</i> | <i>P value</i> | <i>R-square</i> |
|-------------------------------|---------|----------|------|----------------------------------------|------------------------------------|----------------|-----------------|
| Time-Saving Purchases (1=Yes) | .23     | .85      | .09  | < .001                                 |                                    |                |                 |
| Log Income                    | .09     | .34      | .09  | < .001                                 |                                    |                |                 |
| Age                           | -.02    | -.03     | .04  | .465                                   |                                    |                |                 |
| Age Squared                   | .05     | .05      | .03  | .065                                   |                                    |                |                 |
| Marital Status (1=Married)    | .09     | .37      | .10  | <.001                                  |                                    |                |                 |
| # of Hours Worked/Week        | -.02    | -.003    | .003 | .433                                   |                                    |                |                 |
| Gender (1=Female)             | -.03    | -.13     | .09  | .160                                   |                                    |                |                 |
| # of Kids at Home             | .14     | .21      | .04  | < .001                                 | <i>F</i> (8,1604)=24.78            | < .001         | .11             |

**Table S23b**

Time-saving purchases (1=Yes) predicting SWL in Study 7 with additional + revised covariates

| <i>Predictor</i>                   | $\beta$ | <i>B</i> | (SE) | <i>P value</i><br><i>for predictor</i> | <i>F value</i><br><i>for model</i> | <i>P value</i> | <i>R-square</i> |
|------------------------------------|---------|----------|------|----------------------------------------|------------------------------------|----------------|-----------------|
| Time-Saving Purchases (1=Yes)      | .15     | .55      | .10  | < .001                                 |                                    |                |                 |
| Log Income                         | .05     | .18      | .09  | .054                                   |                                    |                |                 |
| Age Centered                       | .01     | .02      | .04  | .608                                   |                                    |                |                 |
| Age Squared                        | .05     | .05      | .03  | .045                                   |                                    |                |                 |
| Marital Status (1=Married)         | .08     | .30      | .10  | .003                                   |                                    |                |                 |
| # of Hours Worked/Week             | -.01    | -.002    | .003 | .567                                   |                                    |                |                 |
| Gender (1=Female)                  | -.02    | -.09     | .09  | .313                                   |                                    |                |                 |
| # of Kids at Home                  | .12     | .18      | .04  | < .001                                 |                                    |                |                 |
| Amount Spent on Bills/Week         | .02     | .008     | .01  | .543                                   |                                    |                |                 |
| Amount Spent on Material Purchases | .13     | .07      | .02  | < .001                                 |                                    |                |                 |
| Amount Spent on Experiences        | .13     | .06      | .01  | < .001                                 | <i>F</i> (11,1601)=26.26           | < .001         | .15             |

**Table S24a**

Amount spent on time-saving purchases predicting SWL in Study 7 with primary covariates

| <i>Predictor</i>            | $\beta$ | <i>B</i> | (SE) | <i>P value</i><br><i>for predictor</i> | <i>F value</i><br><i>for model</i> | <i>P value</i> | <i>R-square</i> |
|-----------------------------|---------|----------|------|----------------------------------------|------------------------------------|----------------|-----------------|
| Amount Spent on Time-Saving | .28     | .14      | .01  | < .001                                 |                                    |                |                 |
| Household Income            | .08     | .04      | .01  | .003                                   |                                    |                |                 |
| Age                         | .01     | .02      | .04  | .615                                   |                                    |                |                 |
| Marital Status (1=Married)  | .08     | .31      | .10  | .002                                   |                                    |                |                 |
| # of Hours Worked/Week      | -.01    | -.001    | .003 | .687                                   |                                    |                |                 |
| Gender (1=Female)           | -.02    | -.06     | .09  | .493                                   |                                    |                |                 |
| # of Kids at Home           | .11     | .16      | .04  | <.001                                  | <i>F</i> (7,1604)=34.70            | < .001         | .13             |

**Table S24b**

Amount spent on time-saving purchases predicting SWL in Study 7 with additional covariates

| <i>Predictor</i>                   | $\beta$ | <i>B</i> | (SE) | <i>P value</i><br><i>for predictor</i> | <i>F value</i><br><i>for model</i> | <i>P value</i> | <i>R-square</i> |
|------------------------------------|---------|----------|------|----------------------------------------|------------------------------------|----------------|-----------------|
| Amount Spent on Time-Saving        | .18     | .09      | .02  | < .001                                 |                                    |                |                 |
| Household Income                   | .05     | .02      | .01  | .071                                   |                                    |                |                 |
| Age                                | .03     | .05      | .04  | .199                                   |                                    |                |                 |
| Marital Status (1=Married)         | .07     | .28      | .10  | .005                                   |                                    |                |                 |
| # of hours Worked/Week             | -.01    | -.001    | .003 | .657                                   |                                    |                |                 |
| Gender (1=Female)                  | -.02    | -.06     | .09  | .519                                   |                                    |                |                 |
| # of Kids at Home                  | .10     | .16      | .04  | < .001                                 |                                    |                |                 |
| Amount Spent on Bills/week         | .002    | .001     | .01  | .944                                   |                                    |                |                 |
| Amount Spent on Material purchases | .10     | .06      | .02  | <.001                                  |                                    |                |                 |
| Amount Spent on Experiences        | .11     | .05      | .01  | < .001                                 | <i>F</i> (10,1601)=28.90           | < .001         | .15             |

## Study 8: Experimental Study

### Additional Methodological Details & Results

**Participants.** In this experiment, we recruited participants from Science World, a local science museum in Vancouver, Canada. We also recruited participants from online advertisements on Craigslist. Individuals were eligible to participate if they lived in Vancouver, were interested and able to spend two payments of \$40 on two consecutive weekends, were employed at least part-time, and were over the age of 19 (the legal age of consent in Canada). We asked participants to report exactly what they intended to purchase in each of the spending weeks. Only participants who could report on two purchases that they would make during the study were eligible to participate. Participants were predominately female, married or in a marriage-like relationship, and affluent (Table S25).

**Table S25**

Demographic characteristics of participants from Study 8 ( $N=60$ ; within-subjects study)

|                                         | Mean (SD)     | Range         |
|-----------------------------------------|---------------|---------------|
| Gender (% Female)                       | 64.4%         |               |
| # of Hours Worked/Week                  | 35.65 (10.50) | 6.00 to 60.00 |
| # of Kids Living at Home                | 1.07 (1.04)   | 0.00 to 3.00  |
| Annual Household Income <sup>a</sup>    | 7.67 (3.26)   | 1.00 to 12.00 |
| Marital Status (% Married) <sup>b</sup> | 66%           |               |

<sup>a</sup>This mean corresponds to \$70,000-\$79,999. The range of this variable represents the categories "\$10,000-\$19,999" to "\$250,000-\$499,999." <sup>b</sup>This variable represents the proportion of participants who report being married or being in a marriage-like relationship.

## Results

### Manipulation Check

As expected, participants reported that the time-saving purchases saved a moderate amount of time ( $M=2.10$ ,  $SD=1.27$ ) whereas the material purchases neither cost nor saved time ( $M=-0.52$ ,  $SD=1.32$ ),  $t(59)=11.60$ ,  $p<0.001$ ,  $d=3.02$ .

## Mediation Analyses

**Analyses Overview.** As described in text, participants reported greater end-of-day positive affect and lower end-of-day negative affect. Participants also reported significantly greater positive to negative affect balance. We then examined whether these benefits were explained by reductions in time stress. To examine whether the benefits of time-saving purchases were explained by reductions in perceived time pressure, we conducted within subject mediation analyses and tested the significance of the indirect effects using the MEMORE macro (8).

**Mediation.** As described in text, time-saving purchases increased positive affect by reducing people's feelings of time pressure. The same pattern of results held for negative affect and affect balance. See Figures S2 and S3 for the full mediation analyses.

## Purchase Characteristics

**Overview.** Participants reported that material purchases were more exceptional as compared to the time-saving purchases. In contrast, participants viewed the time-saving purchases as more helpful as compared to the material purchases. The time-saving and material purchases did not significantly differ on any other dimension and participants did not report feeling higher in social status after making a time-saving vs. material purchase. See Table S26.

**Helpfulness.** Because participants reported that time-saving purchases were significantly more helpful than the material purchases, we examined whether helpfulness could explain the well-being benefits of time-saving vs. material purchases. Specifically, we conducted within-subject mediation analyses predicting positive affect, negative affect, and affect balance. The indirect effect confidence intervals crossed 0 in each of these models, suggesting that helpfulness could not explain why time-saving purchases resulted in greater end-of-day well-being.

**Figure S2**

The effect of Time-saving purchases on end-of-day negative affect through time pressure

Indirect Effect: -0.10 (0.05) [-0.22, -0.02]

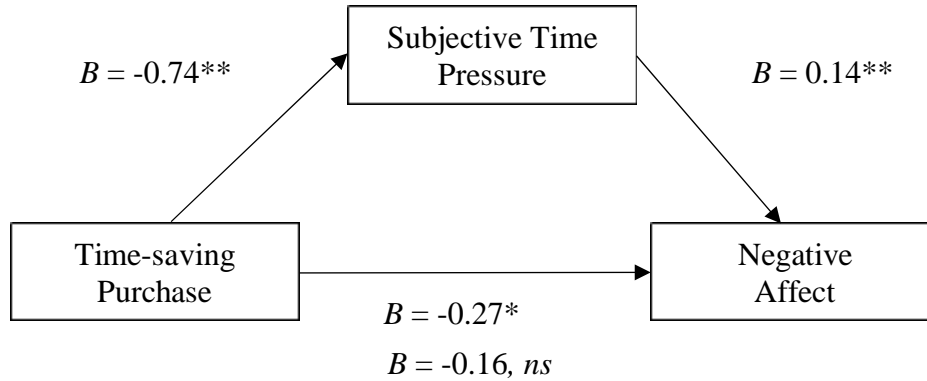**Figure S3**

The effect of Time-saving purchases on end-of-day affect balance through time pressure

Indirect Effect: 0.21 (0.11) [0.04, 0.46]

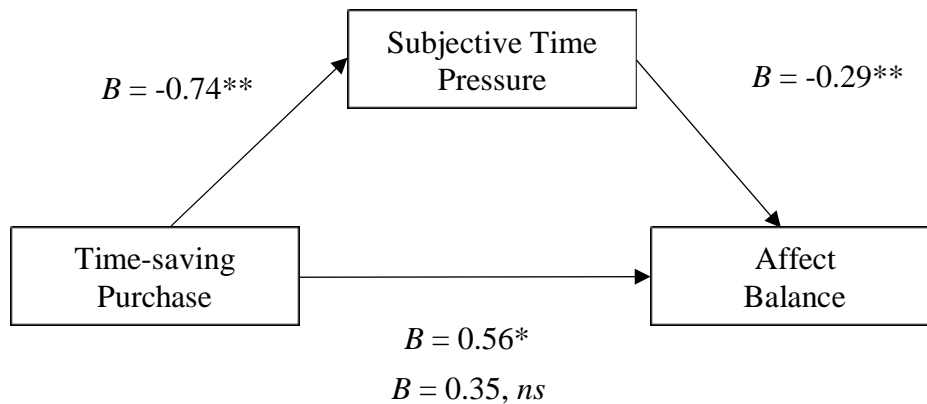

*Notes.* All  $B$ 's represent unstandardized regression coefficients obtained through bootstrapping using 10,000 resamples. The range in brackets represents the 95% confidence interval of the indirect effect.

† $p \leq .10$ , \* $p \leq .05$ , \*\* $p \leq .01$

**Table S26**

Differences in purchase characteristics between time-saving and material purchases

| Purchase Characteristic                                                   | Time-saving | Material    | Paired <i>t</i> -test | <i>P</i> -value | Cohen's <i>d</i> |
|---------------------------------------------------------------------------|-------------|-------------|-----------------------|-----------------|------------------|
| To what extent was the purchase you made today a one-time expense?        | 4.18 (2.80) | 5.30 (2.99) | $t(59) = 2.30$        | 0.025           | 0.60             |
| To what extent would this money have been better spent on something else? | 3.32 (2.40) | 3.78 (2.55) | $t(59) = 0.97$        | 0.338           | 0.25             |
| To what extent was this money well spent?                                 | 7.25 (2.01) | 7.13 (1.89) | $t(59) = 0.31$        | 0.755           | 0.08             |
| To what extent was this purchase helpful?                                 | 6.38 (0.67) | 5.73 (1.29) | $t(59) = 3.91$        | < .001          | 1.02             |
| To what extent was this purchase fun?                                     | 3.15 (1.65) | 3.02 (1.61) | $t(59) = 0.55$        | 0.585           | 0.14             |
| To what extent was this purchase high in social status?                   | 3.68 (1.27) | 3.63 (1.69) | $t(59) = 0.20$        | 0.842           | 0.05             |
| Where would you place yourself on this ladder (0=Lowest, 10=Highest)      | 6.36 (1.56) | 6.35 (1.54) | $t(59) = 0.07$        | 0.948           | 0.02             |



## **Study 9: Purchase Predictions Data**

### **Additional Results**

In this study, 2.0% of the purchases were classified as time-saving purchases, 23.5% were classified as material purchases, 51.0% were classified as prosocial purchases, and 54.1% were classified as experiential purchases. These results suggest that, despite the potential benefits of buying time, many participants do not consider spending money in this way.

### Supplementary References

1. Lee R, Draper M, Lee S (2001) Social connectedness, dysfunctional interpersonal behaviors, psychological distress: Testing a mediator model. *J. Counsel. Psychol.* **48**(3): 310-318.
2. Steger MF, Frazier P, Oishi S, Kaler M (2006) The meaning in life questionnaire: Assessing the presence of and search for meaning in life. *J. Counsel. Psychol.* **53**(1): 80-92.
3. Nowicki S, Duke MP (1974) A locus of control scale for non-college as well as college adults. *J. Person. Asses.* **38**(2): 136-157.
4. DeVoe SE, Pfeffer J (2011) Time is tight: How higher economic value of time increases feelings of time pressure. *J. App. Psychol.* **96**(4): 665-680.
5. Kasser T, Sheldon KM (2009) Time affluence as a path toward personal happiness and ethical business practice: Empirical evidence from four studies. *J. Bus. Eth.* **84**(2): 243-255.
6. Smeets P, Bauer R, Gneezy U (2015) Giving behavior of millionaires. *Proc Natl Acad Sci USA* **112**:10641–10644.
7. Bekkers, R., Boonstoppel, E. & De Wit, A (2017) Giving in the Netherlands Panel Survey - User Manual, Version 2.7. Center for Philanthropic Studies, VU Amsterdam, <http://osf.io/4unf9/>
8. Montoya AK, Hayes AF (2017) Two-condition within-participant statistical mediation analysis: A path-analytic framework. *Psychol Methods* **22**:6–27.
